# Supplementary material for: Physicochemical Quantitative Analysis of the Oil–Water Interface as Affected by the Mutual Interactions between Pea Protein Isolate and Mono- and Diglycerides
Source: MDPI journal article supplement (doi:10.3390/foods13010176), 2024-01-04
Supplement: s1 [file s1]

**Table S1** Adsorbed proteins identified by LC-MS/MS in the emulsion that prepared by PPI and MDG at different concentrations and their relative abundance.

| N  | Accession  | Description                | MW [kDa] | Fold change<br>(H:L) | Sig. | Up/Down | Fold change<br>(M:L) | Sig. | Up/Down |
|----|------------|----------------------------|----------|----------------------|------|---------|----------------------|------|---------|
| 1  | CAA32239.1 | vicilin                    | 52.2     | 1.022 ± 0.039        |      |         | 1.007 ± 0.022        |      |         |
| 2  | P02856.1   | vicilin 14 kDa             | 14       | 0.695 ± 0.056        | **   | ↓       | 1.022 ± 0.123        |      |         |
| 3  | CBK38917.1 | vicilin 47 kDa             | 49.4     | 1.035 ± 0.062        |      |         | 1.069 ± 0.037        |      |         |
| 4  | CBK38922.1 | vicilin 47 kDa             | 49.6     | 1.280 ± 0.125        |      |         | 1.361 ± 0.179        | *    | ↑       |
| 5  | CAF25233.1 | vicilin, partial           | 47.3     | 1.030 ± 0.079        |      |         | 1.135 ± 0.026        | **   | ↑       |
| 6  | AAA33690.1 | vicilin, partial           | 7.3      | 0.687 ± 0.037        | **   | ↓       | 0.886 ± 0.206        |      |         |
| 7  | CAA68708.1 | vicilin precursor, partial | 49.5     | 0.013 ± 0.001        | **   | ↓       | 0.149 ± 0.007        | **   | ↓       |
| 8  | P02855.1   | provicilin (type A)        | 31.5     | 0.922 ± 0.001        | **   | ↓       | 1.001 ± 0.013        |      |         |
| 9  | CAB82855.1 | convicilin                 | 72       | 0.952 ± 0.002        | **   | ↓       | 0.912 ± 0.030        | *    | ↓       |
| 10 | 1713472A   | convicilin                 | 71.4     | 0.806 ± 0.029        | **   | ↓       | 0.965 ± 0.260        |      |         |
| 11 | CAP06311.1 | convicilin, partial        | 60.1     | 0.538 ± 0.044        | **   | ↓       | 0.869 ± 0.020        | **   | ↓       |
| 12 | CAP06307.1 | convicilin, partial        | 19.2     | 0.793 ± 0.084        | *    | ↓       | 0.750 ± 0.116        | *    | ↓       |
| 13 | CAA30067.1 | legumin                    | 56.9     | 0.907 ± 0.021        | **   | ↓       | 0.951 ± 0.022        | *    | ↓       |
| 14 | CAA35056.1 | legumin                    | 59.2     | 1.045 ± 0.014        | *    | ↑       | 0.979 ± 0.036        |      |         |
| 15 | S26688     | legumin K                  | 56.2     | 0.993 ± 0.098        |      |         | 0.897 ± 0.080        |      |         |
| 16 | CAA47809.1 | legumin (minor small)      | 64.8     | 0.773 ± 0.084        | *    | ↓       | 0.919 ± 0.024        | **   | ↓       |
| 17 | AAA33677.1 | legumin precursor, partial | 23.4     | 4.833 ± 1.535        | *    | ↑       | 4.457 ± 1.822        |      |         |
| 18 | AAA33678.1 | legumin precursor, partial | 39       | 0.701 ± 0.058        | **   | ↓       | 0.432 ± 0.202        | *    | ↓       |
| 19 | 3KSC_F     | prolegumin chain F         | 56.6     | 1.025 ± 0.065        |      |         | 0.960 ± 0.046        |      |         |
| 20 | CAE00466.1 | albumin 1                  | 13.9     | 0.973 ± 0.111        |      |         | 1.043 ± 0.095        |      |         |
| 21 | P62927.1   | albumin-1 B                | 14       | 0.983 ± 0.060        |      |         | 1.214 ± 0.009        | **   | ↑       |
| 22 | P62930.1   | albumin-1 E                | 13.8     | 0.605 ± 0.137        | *    | ↓       | 1.688 ± 0.025        | **   | ↑       |
| 23 | AAA02981.1 | albumin 2                  | 26.2     | 0.896 ± 0.040        | *    | ↓       | 0.925 ± 0.036        | *    | ↓       |

Fold change was calculated by ratio of H:L or M:L. The up arrow represented that the fold change was greater than 1, while the down arrow represented that the fold change was less than 1. \*,  $p < 0.05$ ; \*\*,  $p < 0.01$  (n=3).
